# Supplementary material for: The Reproducibility and Comparative Validity of a Non-Nutritive Sweetener Food Frequency Questionnaire
Source: MDPI journal article supplement (doi:10.3390/nu10030334), 2018-03-10
Supplement: s1 [file s1]

**Table S2.** Reproducibility statistics of total non-nutritive sweetener (NNS) mg consumption from two administrations of a NNS food frequency questionnaire (NNS-FFQ 1 and NNS-FFQ 2) based on demographic characteristics ( $n = 123$ ).

| Demographic Characteristics |                                        | Total NNS<br>Mean Difference between<br>NNS-FFQ 1 and 2 $\pm$ SE | Spearman's<br>Correlations |
|-----------------------------|----------------------------------------|------------------------------------------------------------------|----------------------------|
| Sex                         | Male ( $n = 54$ )                      | 36.8 $\pm$ 24.5                                                  | 0.93**                     |
|                             | Female ( $n = 69$ )                    | 16.2 $\pm$ 25.8                                                  | 0.92**                     |
| Age                         | 18-64 years ( $n = 116$ )              | 46.6 $\pm$ 51.3                                                  | 0.92*                      |
|                             | 65+ years ( $n = 7$ )                  | 12.9 $\pm$ 11.1                                                  | 0.89**                     |
| Race                        | White ( $n = 93$ )                     | 50.7 $\pm$ 63.9                                                  | 0.93**                     |
|                             | Non-White ( $n = 30$ )                 | 20.0 $\pm$ 11.4                                                  | 0.74**                     |
| Education                   | High School or Less ( $n = 6$ )        | 20.8 $\pm$ 45.1                                                  | 0.77*                      |
|                             | Some College or More ( $n = 117$ )     | 46.5 $\pm$ 50.8                                                  | 0.92**                     |
| BMI                         | Underweight/Normal Weight ( $n = 69$ ) | 10.4 $\pm$ 17.0                                                  | 0.90**                     |
|                             | Overweight/Obese ( $n = 54$ )          | 111.7 $\pm$ 107.8                                                | 0.93**                     |

\* $P \leq 0.05$ , \*\* $P \leq 0.01$

**Table S3.** Validity statistics of total non-nutritive sweetener (NNS) mg consumption from a NNS food frequency questionnaire (NNS-FFQ 2) and three dietary recalls based on demographic characteristics ( $n = 123$ ).

| Demographic Characteristics |                                        | Total NNS<br>Mean Difference between<br>NNS-FFQ 2 and Dietary<br>Recalls $\pm$ SE | Spearman's<br>Correlations |
|-----------------------------|----------------------------------------|-----------------------------------------------------------------------------------|----------------------------|
| Sex                         | Male ( $n = 54$ )                      | 30.9 $\pm$ 19.2                                                                   | 0.69**                     |
|                             | Female ( $n = 69$ )                    | 101.2 $\pm$ 84.5                                                                  | 0.44**                     |
| Age                         | 18-64 years ( $n = 116$ )              | 23.0 $\pm$ 18.8                                                                   | 0.53**                     |
|                             | 65+ years ( $n = 7$ )                  | 62.9 $\pm$ 55.2                                                                   | 0.96**                     |
| Race                        | White ( $n = 93$ )                     | 38.4 $\pm$ 18.0*                                                                  | 0.63**                     |
|                             | Non-White ( $n = 30$ )                 | 15.6 $\pm$ 47.9                                                                   | 0.10                       |
| Education                   | High School or Less ( $n = 6$ )        | 70.3 $\pm$ 112.5                                                                  | 0.75*                      |
|                             | Some College or More ( $n = 117$ )     | 30.2 $\pm$ 18.0                                                                   | 0.55**                     |
| BMI                         | Underweight/Normal Weight ( $n = 69$ ) | 15.9 $\pm$ 27.4                                                                   | 0.44**                     |
|                             | Overweight/Obese ( $n = 54$ )          | 37.2 $\pm$ 21.4                                                                   | 0.64**                     |

\* $P \leq 0.05$ , \*\* $P \leq 0.01$
