# Supplementary material for: The Reproducibility and Comparative Validity of a Non-Nutritive Sweetener Food Frequency Questionnaire
Source: MDPI journal article supplement (doi:10.3390/nu10030334), 2018-03-10
Supplement: s1 [file s1]

# Artificial Sweetener (Non-nutritive Sweetener) Intake Questionnaire

## Instructions:

In the past month, please indicate your response for each food or beverage item by marking an "X" in the box for "how often" and "how much each time".

1. Indicate how often you consumed the following items. For example, if you drank diet soda 5 times per week, mark 4-6 times per week.

2. Indicate the approximate amount of each item you consumed each time.

For example, if you drank 1 cup of diet soda each time, mark 1 cup under "how much each time".

3. Count packets of artificial sweeteners added to foods/beverages at the top of page 2 in the artificial sweetener packet category.

4. Please complete **both** the front and back of the questionnaire.

Participant ID: \_\_\_\_\_

Date: \_\_\_\_\_

| Beverages                 |                                                                                                                                                                                                                                                                                                             | HOW OFTEN (MARK ONE)  |                       |                       |                       |                       |                       |                       | HOW MUCH EACH TIME (MARK ONE) |                       |                       |                       |                       |
|---------------------------|-------------------------------------------------------------------------------------------------------------------------------------------------------------------------------------------------------------------------------------------------------------------------------------------------------------|-----------------------|-----------------------|-----------------------|-----------------------|-----------------------|-----------------------|-----------------------|-------------------------------|-----------------------|-----------------------|-----------------------|-----------------------|
|                           |                                                                                                                                                                                                                                                                                                             | Never or<br><1x/week  | 1x/<br>week           | 2-3x/<br>week         | 4-6x/<br>week         | 1x/day                | 2x/day                | 3x/day                | <6 fl oz/<br>¾ cup            | 8 fl oz/<br>1 cup     | 12 fl oz/<br>1½ cups  | 16 fl oz/<br>2 cups   | >20 fl oz/<br>2½ cups |
| Flavored Water            | Gatorade G2, Propel Zero                                                                                                                                                                                                                                                                                    | <input type="radio"/>         | <input type="radio"/> | <input type="radio"/> | <input type="radio"/> | <input type="radio"/> |
|                           | <b>Sugar-Free</b> sparkling or carbonated water                                                                                                                                                                                                                                                             | <input type="radio"/>         | <input type="radio"/> | <input type="radio"/> | <input type="radio"/> | <input type="radio"/> |
|                           | <b>Diet</b> Tonic water                                                                                                                                                                                                                                                                                     | <input type="radio"/>         | <input type="radio"/> | <input type="radio"/> | <input type="radio"/> | <input type="radio"/> |
|                           | VitaZest, Fruit2O, <b>Sugar-Free</b> flavored water                                                                                                                                                                                                                                                         | <input type="radio"/>         | <input type="radio"/> | <input type="radio"/> | <input type="radio"/> | <input type="radio"/> |
| Juice or Flavored Drink   | <b>Light</b> Tang, Crystal light (packets for water bottle), <b>Sugar-Free</b> Kool-Aid (dry mix), Country Time Light Lemonade (dry mix),                                                                                                                                                                   | <input type="radio"/>         | <input type="radio"/> | <input type="radio"/> | <input type="radio"/> | <input type="radio"/> |
|                           | Ocean Spray <b>Lightstyle</b> Juice, Orchard <b>Light</b> Cranberry Juice, Tropicana Twister <b>Light</b> , <b>Diet</b> Snapple                                                                                                                                                                             | <input type="radio"/>         | <input type="radio"/> | <input type="radio"/> | <input type="radio"/> | <input type="radio"/> |
|                           | Ocean Spray <b>Light</b> or <b>light</b> cranberry juice                                                                                                                                                                                                                                                    | <input type="radio"/>         | <input type="radio"/> | <input type="radio"/> | <input type="radio"/> | <input type="radio"/> |
| Diet Soda Pop/ Soft Drink | Shasta, Rite Pure Zero, Coke with Splenda, <b>Diet</b> 7UP                                                                                                                                                                                                                                                  | <input type="radio"/>         | <input type="radio"/> | <input type="radio"/> | <input type="radio"/> | <input type="radio"/> |
|                           | <b>Diet</b> Pepsi: Wild Cherry, Vanilla, Lime, or Max                                                                                                                                                                                                                                                       | <input type="radio"/>         | <input type="radio"/> | <input type="radio"/> | <input type="radio"/> | <input type="radio"/> |
|                           | <b>Diet</b> Coke: Vanilla, Lime, or Cherry, Coke Zero                                                                                                                                                                                                                                                       | <input type="radio"/>         | <input type="radio"/> | <input type="radio"/> | <input type="radio"/> | <input type="radio"/> |
|                           | Fresca, FantaZero, Tropicana Twister <b>Light</b> , <b>Diet</b> Sunkist Orange, Sprite Zero, Pibb Zero, <b>Diet</b> Mountain Dew Code Red, <b>Diet</b> Mello Yello, <b>Diet</b> Cherry 7UP, <b>Diet</b> Barq's Root Beer, <b>Diet</b> A&W Root Beer                                                         | <input type="radio"/>         | <input type="radio"/> | <input type="radio"/> | <input type="radio"/> | <input type="radio"/> |
|                           | <b>Diet</b> Mountain Dew, Pepsi Next                                                                                                                                                                                                                                                                        | <input type="radio"/>         | <input type="radio"/> | <input type="radio"/> | <input type="radio"/> | <input type="radio"/> |
|                           | Zevia soda                                                                                                                                                                                                                                                                                                  | <input type="radio"/>         | <input type="radio"/> | <input type="radio"/> | <input type="radio"/> | <input type="radio"/> |
|                           | <b>Diet</b> Sunkist fruit flavors (other than orange), <b>Diet</b> Sundrop, <b>Diet</b> Schweppes Ginger Ale, <b>Diet</b> Pepsi Twist/regular/cafeine free, <b>Diet</b> Mug, <b>Diet</b> Mr. Pibb, <b>Diet</b> Dr. Pepper, <b>Diet</b> Crush, <b>Diet</b> Canada Dry Ginger Ale, <b>Diet</b> A&W Cream Soda | <input type="radio"/>         | <input type="radio"/> | <input type="radio"/> | <input type="radio"/> | <input type="radio"/> |
| Diet Tea                  | <b>Diet</b> Bottled Lipton Tea, Crystal Light Instant                                                                                                                                                                                                                                                       | <input type="radio"/>         | <input type="radio"/> | <input type="radio"/> | <input type="radio"/> | <input type="radio"/> |
|                           | Crystal Light decaffeinated, <b>Diet</b> Nestea                                                                                                                                                                                                                                                             | <input type="radio"/>         | <input type="radio"/> | <input type="radio"/> | <input type="radio"/> | <input type="radio"/> |
|                           | <b>Diet</b> Lipton Instant Iced Tea Mix                                                                                                                                                                                                                                                                     | <input type="radio"/>         | <input type="radio"/> | <input type="radio"/> | <input type="radio"/> | <input type="radio"/> |
| Chocolate Drink           | <b>Sugar-Free</b> Nestle Nesquik or <b>Sugar-Free</b> Swiss Miss                                                                                                                                                                                                                                            | <input type="radio"/>         | <input type="radio"/> | <input type="radio"/> | <input type="radio"/> | <input type="radio"/> |
| Coffee                    | Frappuccino <b>Light</b> , ready to drink                                                                                                                                                                                                                                                                   | <input type="radio"/>         | <input type="radio"/> | <input type="radio"/> | <input type="radio"/> | <input type="radio"/> |
| Energy Drink              | <b>Sugar-Free Versions</b> : Sobe, No Fear, AMP, Rockstar, Monster, Venom Majave                                                                                                                                                                                                                            | <input type="radio"/>         | <input type="radio"/> | <input type="radio"/> | <input type="radio"/> | <input type="radio"/> |
|                           | <b>Sugar-Free</b> Red Bull                                                                                                                                                                                                                                                                                  | <input type="radio"/>         | <input type="radio"/> | <input type="radio"/> | <input type="radio"/> | <input type="radio"/> |
| Protein Drink             | Carnation Instant Breakfast <b>No Sugar Added</b> , Slim-fast Easy Digest, Slim-fast Optima                                                                                                                                                                                                                 | <input type="radio"/>         | <input type="radio"/> | <input type="radio"/> | <input type="radio"/> | <input type="radio"/> |
|                           | Slim-fast Meal <b>Low Carb</b>                                                                                                                                                                                                                                                                              | <input type="radio"/>         | <input type="radio"/> | <input type="radio"/> | <input type="radio"/> | <input type="radio"/> |

Please continue to the next page to complete this questionnaire.

Please circle each item you consumed.

# Artificial Sweetener (Non-nutritive Sweetener) Intake Questionnaire

| Artificial Sweetener Packets                                                                                                                               | HOW OFTEN (MARK ONE)  |                       |                       |                       |                       |                       |                       | HOW MUCH EACH TIME (MARK ONE) |                       |                         |                         |                          |
|------------------------------------------------------------------------------------------------------------------------------------------------------------|-----------------------|-----------------------|-----------------------|-----------------------|-----------------------|-----------------------|-----------------------|-------------------------------|-----------------------|-------------------------|-------------------------|--------------------------|
|                                                                                                                                                            | Never or<br><1x/week  | 1x/<br>week           | 2-3x/<br>week         | 4-6x/<br>week         | 1x/day                | 2x/day                | 3x/day                | <1/2<br>packet                | 1<br>packet           | 1 1/2<br>packets        | 2<br>packets            | 3+<br>packets            |
| Sweet 'N Low Powder or Sugar Twin (Saccharin) - Pink Packets                                                                                               | <input type="radio"/>         | <input type="radio"/> | <input type="radio"/>   | <input type="radio"/>   | <input type="radio"/>    |
| Equal or NutraSweet The Original (Aspartame) - Blue Packets                                                                                                | <input type="radio"/>         | <input type="radio"/> | <input type="radio"/>   | <input type="radio"/>   | <input type="radio"/>    |
| Splenda (Sucralose) - Yellow Packets                                                                                                                       | <input type="radio"/>         | <input type="radio"/> | <input type="radio"/>   | <input type="radio"/>   | <input type="radio"/>    |
| Sweet One (Acesulfame Potassium)                                                                                                                           | <input type="radio"/>         | <input type="radio"/> | <input type="radio"/>   | <input type="radio"/>   | <input type="radio"/>    |
| Truvia (Stevia)                                                                                                                                            | <input type="radio"/>         | <input type="radio"/> | <input type="radio"/>   | <input type="radio"/>   | <input type="radio"/>    |
| Stevia In The Raw Packets (Stevia)                                                                                                                         | <input type="radio"/>         | <input type="radio"/> | <input type="radio"/>   | <input type="radio"/>   | <input type="radio"/>    |
| <b>Yogurt and Ice Cream</b>                                                                                                                                | Never or<br><1x/week  | 1x/<br>week           | 2-3x/<br>week         | 4-6x/<br>week         | 1x/day                | 2x/day                | 3x/day                | <4 oz/<br>1/2 cup             | 8 oz/<br>1 cup        | 12 oz/<br>1 1/2 cups    | 16 oz/<br>2 cups        | >20 oz/<br>2 1/2 cups    |
| Breyers <b>Light</b> Yogurt                                                                                                                                | <input type="radio"/>         | <input type="radio"/> | <input type="radio"/>   | <input type="radio"/>   | <input type="radio"/>    |
| Yoplait <b>Light</b> Thick & Creamy                                                                                                                        | <input type="radio"/>         | <input type="radio"/> | <input type="radio"/>   | <input type="radio"/>   | <input type="radio"/>    |
| Blue Bunny <b>Light</b> Yogurt                                                                                                                             | <input type="radio"/>         | <input type="radio"/> | <input type="radio"/>   | <input type="radio"/>   | <input type="radio"/>    |
| Dannon <b>Light</b> & Fit or Activia <b>Light</b> Yogurt                                                                                                   | <input type="radio"/>         | <input type="radio"/> | <input type="radio"/>   | <input type="radio"/>   | <input type="radio"/>    |
| Yoplait <b>Light</b> Fat Free Yogurt                                                                                                                       | <input type="radio"/>         | <input type="radio"/> | <input type="radio"/>   | <input type="radio"/>   | <input type="radio"/>    |
| <b>Light Ice Creams:</b> Edy's, Dreyer's, Blue Bell, Baskin-Robbins, Popsicle                                                                              | <input type="radio"/>         | <input type="radio"/> | <input type="radio"/>   | <input type="radio"/>   | <input type="radio"/>    |
| Blue Bunny <b>Light</b> Ice Cream                                                                                                                          | <input type="radio"/>         | <input type="radio"/> | <input type="radio"/>   | <input type="radio"/>   | <input type="radio"/>    |
| <b>Sugar-Free</b> Creamsicle or Dreamsicle                                                                                                                 | <input type="radio"/>         | <input type="radio"/> | <input type="radio"/>   | <input type="radio"/>   | <input type="radio"/>    |
| <b>Cookies and Bars</b>                                                                                                                                    | Never or<br><1x/week  | 1x/<br>week           | 2-3x/<br>week         | 4-6x/<br>week         | 1x/day                | 2x/day                | 3x/day                | <1<br>cookie<br>or bar        | 1<br>cookie<br>or bar | 2<br>cookies<br>or bars | 3<br>cookies<br>or bars | 4+<br>cookies<br>or bars |
| <b>Sugar-Free Versions:</b> Pillsbury, Nabisco, Murray Cookies, Slim-fast Snack/M meal Bar                                                                 | <input type="radio"/>         | <input type="radio"/> | <input type="radio"/>   | <input type="radio"/>   | <input type="radio"/>    |
| <b>Sugar-Free Versions:</b> Quaker Chewy, Power Bar, Snackwell, Tastykake Sensables, Pepperidge Farm Milano, Slim-fast Meal Bar (Chocolate Peanut Caramel) | <input type="radio"/>         | <input type="radio"/> | <input type="radio"/>   | <input type="radio"/>   | <input type="radio"/>    |
| <b>Candy</b>                                                                                                                                               | Never or<br><1x/week  | 1x/<br>week           | 2-3x/<br>week         | 4-6x/<br>week         | 1x/day                | 2x/day                | 3x/day                | <1<br>piece                   | 1 piece               | 2 pieces                | 3 pieces                | 4+<br>pieces             |
| <b>Sugar-Free</b> Chewing gum                                                                                                                              | <input type="radio"/>         | <input type="radio"/> | <input type="radio"/>   | <input type="radio"/>   | <input type="radio"/>    |
| <b>Sugar-Free Versions:</b> Twizzler, Jolly Rancher, Fifty 50, Sweet 'N Low Fruit Splash, Werther's                                                        | <input type="radio"/>         | <input type="radio"/> | <input type="radio"/>   | <input type="radio"/>   | <input type="radio"/>    |
| <b>Sugar-Free</b> Chocolate (Crystal Light Candy, DeMet's, Dove, Fifty 50, York Peppermint Patty),<br><b>Sugar-Free</b> Gum drops, Gummy worms/bears       | <input type="radio"/>         | <input type="radio"/> | <input type="radio"/>   | <input type="radio"/>   | <input type="radio"/>    |
| <b>Jello and Pudding</b>                                                                                                                                   | Never or<br><1x/week  | 1x/<br>week           | 2-3x/<br>week         | 4-6x/<br>week         | 1x/day                | 2x/day                | 3x/day                | 1/2 cup                       | 1 cup                 | 1 1/2 cups              | 2 cups                  | 2 1/2+<br>cups           |
| <b>Sugar-Free</b> or <b>Reduced-Calorie</b> Jell-O Pudding (cooked or instant)                                                                             | <input type="radio"/>         | <input type="radio"/> | <input type="radio"/>   | <input type="radio"/>   | <input type="radio"/>    |
| <b>Sugar-Free</b> or <b>Reduced-Calorie</b> Jell-O Pudding Cup, Hunt's Snack Pack Pudding Cup (ready to eat)                                               | <input type="radio"/>         | <input type="radio"/> | <input type="radio"/>   | <input type="radio"/>   | <input type="radio"/>    |
| <b>Sugar-Free</b> or <b>Reduced-Calorie</b> Jell-O Gelatin (prepared from dry mix)                                                                         | <input type="radio"/>         | <input type="radio"/> | <input type="radio"/>   | <input type="radio"/>   | <input type="radio"/>    |
| <b>Sugar-Free</b> or <b>Reduced-Calorie</b> Jell-O Gelatin Cup (ready to eat)                                                                              | <input type="radio"/>         | <input type="radio"/> | <input type="radio"/>   | <input type="radio"/>   | <input type="radio"/>    |
| <b>Sugar-Free</b> or <b>Reduced-Calorie</b> Hunt's Snack Pack Gelatin Cup (ready to eat)                                                                   | <input type="radio"/>         | <input type="radio"/> | <input type="radio"/>   | <input type="radio"/>   | <input type="radio"/>    |
| <b>Jelly</b>                                                                                                                                               | Never or<br><1x/week  | 1x/<br>week           | 2-3x/<br>week         | 4-6x/<br>week         | 1x/day                | 2x/day                | 3x/day                | 1 tsp                         | 2 tsps                | 1 tbsp                  | 2 tsps                  | 3+ tsps                  |
| <b>Sugar-Free</b> Jelly with sucralose (Smucker's Sugar-Free with Splenda, Great Value Sugar-Free Preserves)                                               | <input type="radio"/>         | <input type="radio"/> | <input type="radio"/>   | <input type="radio"/>   | <input type="radio"/>    |
| <b>Sugar-Free</b> Jelly with stevia or Truvia (Smucker's Sugar-Free with Truvia)                                                                           | <input type="radio"/>         | <input type="radio"/> | <input type="radio"/>   | <input type="radio"/>   | <input type="radio"/>    |
| <b>Coffee Creamer</b>                                                                                                                                      | Never or<br><1x/week  | 1x/<br>week           | 2-3x/<br>week         | 4-6x/<br>week         | 1x/day                | 2x/day                | 3x/day                | 1 tsp                         | 2 tsps                | 1 tbsp                  | 2 tsps                  | 3+ tsps                  |
| <b>Sugar-Free</b> Flavored Creamer (powder or liquid), <b>Sugar-Free</b> CoffeeMate or International Delight                                               | <input type="radio"/>         | <input type="radio"/> | <input type="radio"/>   | <input type="radio"/>   | <input type="radio"/>    |
| <b>Other Products with Artificial Sweeteners:</b>                                                                                                          | Never or<br><1x/week  | 1x/<br>week           | 2-3x/<br>week         | 4-6x/<br>week         | 1x/day                | 2x/day                | 3x/day                | 1/2<br>serving                | 1<br>serving          | 1 1/2<br>serving        | 2<br>serving            | 3<br>servings            |
| Other (List):                                                                                                                                              | <input type="radio"/>         | <input type="radio"/> | <input type="radio"/>   | <input type="radio"/>   | <input type="radio"/>    |
