# Supplementary material for: The Reproducibility and Comparative Validity of a Non-Nutritive Sweetener Food Frequency Questionnaire
Source: MDPI journal article supplement (doi:10.3390/nu10030334), 2018-03-10

**Figure S2.** Correlation scatterplots of total and individual non-nutritive sweetener (NNS) mg consumption via two administrations of a NNS food-frequency questionnaire (NNS-FFQ 1 and NNS-FFQ 2).

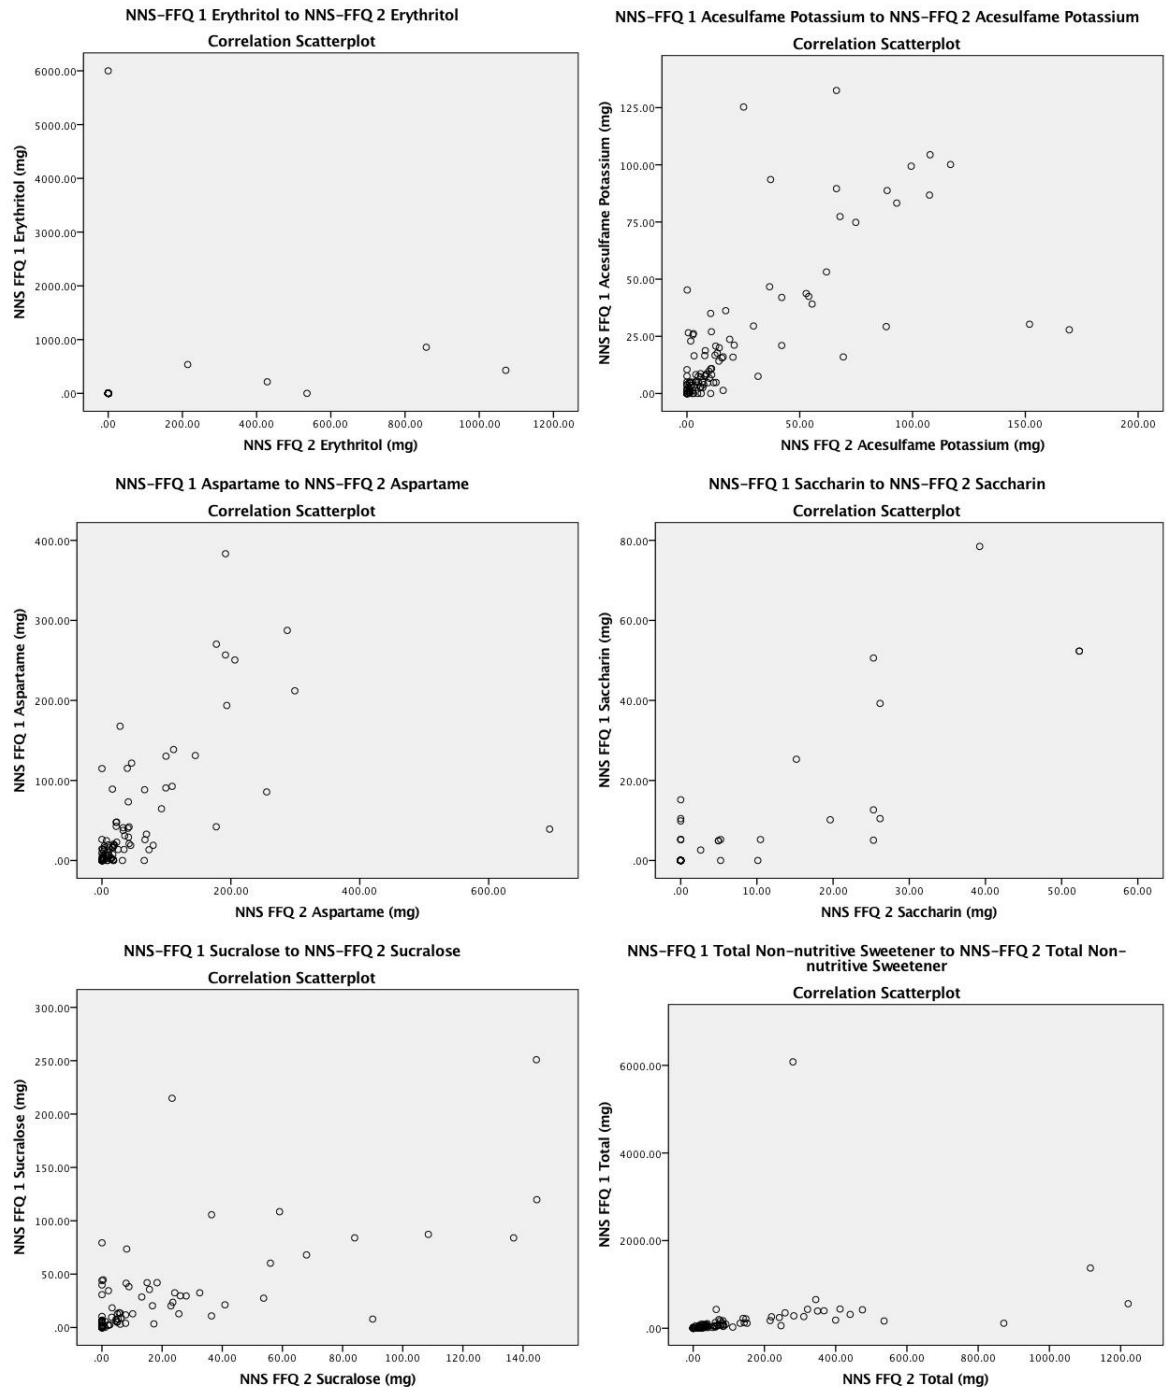

**Figure S3.** Correlation scatterplots of total and individual non-nutritive sweetener (NNS) mg consumption via a NNS food-frequency questionnaire (NNS-FFQ 2) and dietary recalls.

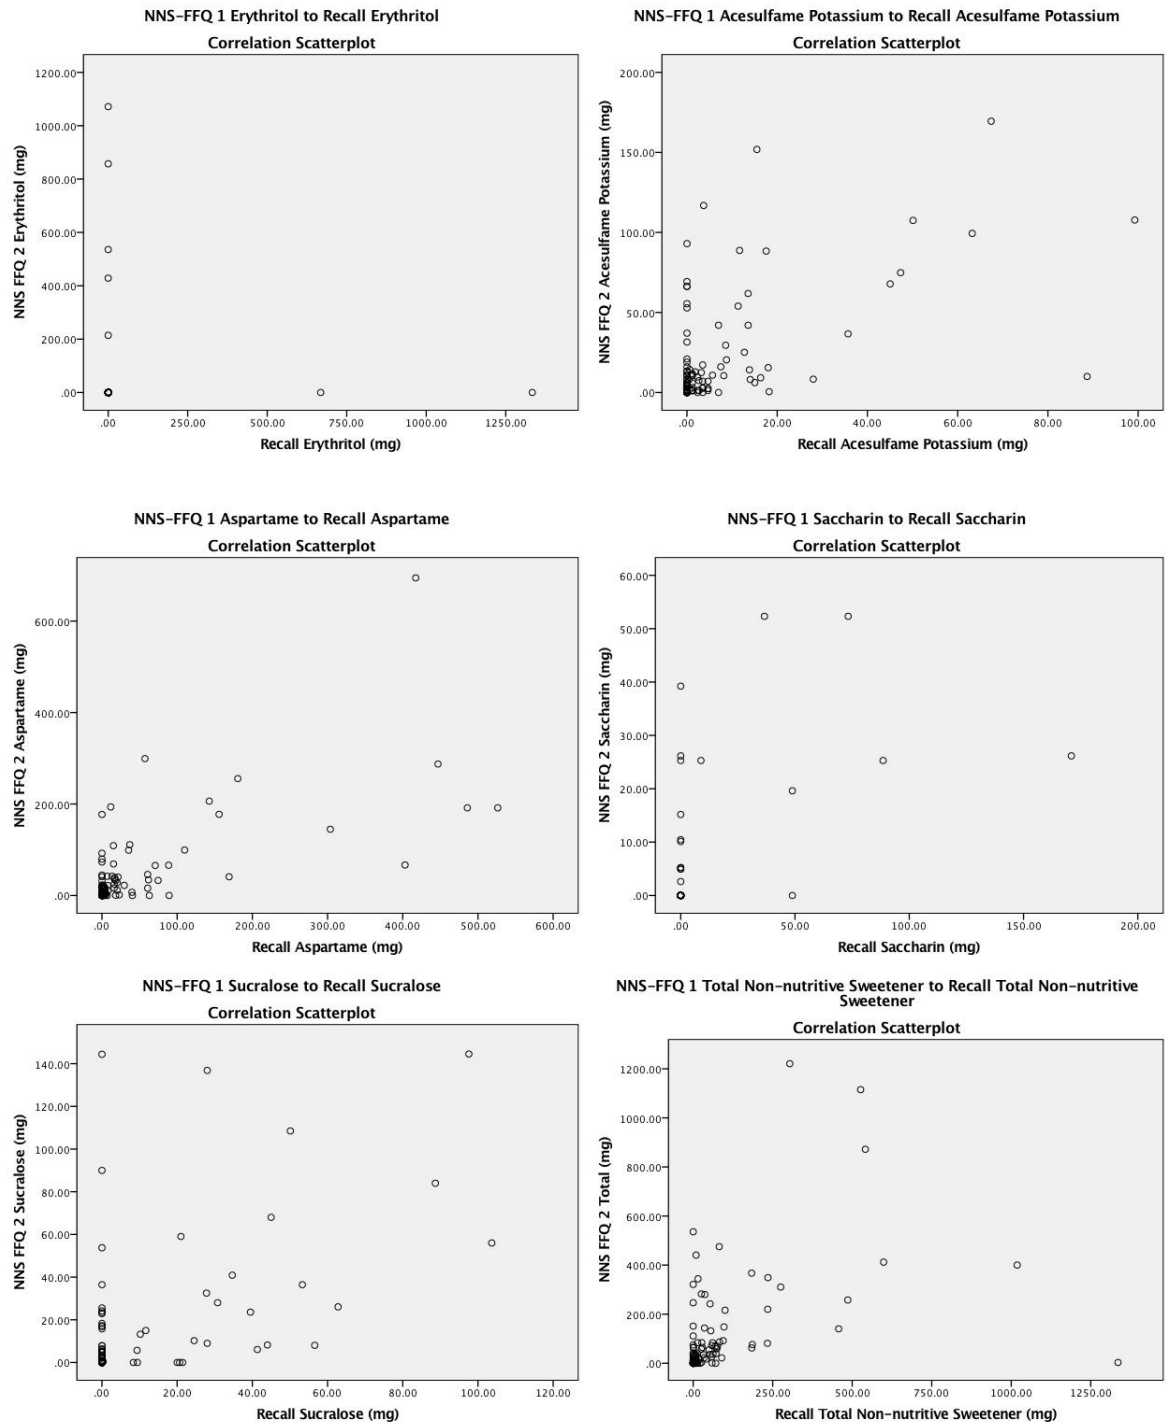

Supplement: s1 [file s1]
