# Supplementary material for: The Reproducibility and Comparative Validity of a Non-Nutritive Sweetener Food Frequency Questionnaire
Source: MDPI journal article supplement (doi:10.3390/nu10030334), 2018-03-10
Supplement: s1 [file s1]

**Table S1.** Descriptive statistics of total and individual non-nutritive sweetener (NNS) mg consumption via two administrations of a NNS food-frequency questionnaire (NNS-FFQ 1 and NNS-FFQ 2) and dietary recalls ( $n = 123$ ).

| Non-nutritive Sweetener Type        | Mean<br>(mg) | Std.<br>Deviation | Median | Minimum | Maximum | Skewness  |            | Kurtosis  |            | Shapiro-Wilk<br>Tests of Normality |        |
|-------------------------------------|--------------|-------------------|--------|---------|---------|-----------|------------|-----------|------------|------------------------------------|--------|
|                                     |              |                   |        |         |         | Statistic | Std. Error | Statistic | Std. Error | Statistic                          | Sig    |
| NNS-FFQ 1 Erythritol (mg)           | 65.3         | 548.7             | 0.00   | 0.0     | 6000.0  | 10.6      | 0.2        | 114.8     | 0.4        | 0.1                                | ≤0.001 |
| NNS-FFQ 1 Acesulfame Potassium (mg) | 18.6         | 28.9              | 5.0    | 0.0     | 132.5   | 2.2       | 0.2        | 4.2       | 0.4        | 0.7                                | ≤0.001 |
| NNS-FFQ 1 Aspartame (mg)            | 35.3         | 67.8              | 7.0    | 0.0     | 383.3   | 2.9       | 0.2        | 8.7       | 0.4        | 0.6                                | ≤0.001 |
| NNS-FFQ 1 Saccharin (mg)            | 3.3          | 11.5              | 0.0    | 0.0     | 78.5    | 4.6       | 0.2        | 22.0      | 0.4        | 0.3                                | ≤0.001 |
| NNS-FFQ 1 Sucralose (mg)            | 18.2         | 37.6              | 2.7    | 0.0     | 250.9   | 3.7       | 0.2        | 17.4      | 0.4        | 0.5                                | ≤0.001 |
| NNS-FFQ 1 Total NNS (mg)            | 140.8        | 566.8             | 24.0   | 0.0     | 6079.1  | 9.7       | 0.2        | 100.9     | 0.4        | 0.2                                | ≤0.001 |
|                                     |              |                   |        |         |         |           |            |           |            |                                    |        |
| NNS-FFQ 2 Erythritol (mg)           | 25.3         | 137.9             | 0.0    | 0.0     | 1071.4  | 6.1       | 0.2        | 39.1      | 0.4        | 0.2                                | ≤0.001 |
| NNS-FFQ 2 Acesulfame Potassium (mg) | 18.8         | 32.6              | 5.0    | 0.0     | 169.5   | 2.5       | 0.2        | 6.1       | 0.4        | 0.6                                | ≤0.001 |
| NNS-FFQ 2 Aspartame (mg)            | 38.7         | 85.1              | 7.1    | 0.0     | 694.5   | 4.7       | 0.2        | 29.7      | 0.4        | 0.5                                | ≤0.001 |
| NNS-FFQ 2 Saccharin (mg)            | 2.9          | 9.2               | 0.0    | 0.0     | 52.3    | 3.8       | 0.2        | 15.5      | 0.4        | 0.4                                | ≤0.001 |
| NNS-FFQ 2 Sucralose (mg)            | 12.1         | 28.0              | 0.0    | 0.0     | 144.6   | 3.3       | 0.2        | 11.4      | 0.4        | 0.5                                | ≤0.001 |
| NNS-FFQ 2 Total NNS (mg)            | 97.6         | 194.4             | 24.6   | 0.0     | 1221.0  | 3.7       | 0.2        | 15.8      | 0.4        | 0.5                                | ≤0.001 |
|                                     |              |                   |        |         |         |           |            |           |            |                                    |        |
| Recall Erythritol (mg)              | 16.3         | 134.0             | 0.0    | 0.0     | 1333.3  | 8.9       | 0.2        | 82.0      | 0.4        | 0.1                                | ≤0.001 |
| Recall Acesulfame Potassium (mg)    | 6.8          | 16.4              | 0.0    | 0.0     | 99.3    | 3.7       | 0.2        | 14.8      | 0.4        | 0.4                                | ≤0.001 |
| Recall Aspartame (mg)               | 36.5         | 97.2              | 1.2    | 0.0     | 526.4   | 3.7       | 0.2        | 13.6      | 0.4        | 0.2                                | ≤0.001 |
| Recall Saccharin (mg)               | 3.9          | 19.6              | 0.0    | 0.0     | 170.9   | 6.5       | 0.2        | 47.5      | 0.4        | 0.5                                | ≤0.001 |
| Recall Sucralose (mg)               | 8.0          | 19.7              | 0.0    | 0.0     | 103.7   | 3.0       | 0.2        | 9.6       | 0.4        | 0.5                                | ≤0.001 |
| Recall Total NNS (mg)               | 72.3         | 183.6             | 7.7    | 0.0     | 1335.7  | 4.5       | 0.2        | 24.1      | 0.4        | 0.4                                | ≤0.001 |
